# Supplementary material
Source: PubMed Central journal article supplement (PMC4241134)
Supplement: NIHMS634149-supplement-Supplemental_Material.pdf [file NIHMS634149-supplement-Supplemental_Material.pdf]

## **SUPPLEMENTAL MATERIAL**

## Figure 1. Search Algorithm

### PubMed / MEDLINE Search Algorithm:

((heart-assist devices\* OR left ventricular assist device[tiab] OR lvad[tiab] OR mechanical circulatory support[tiab])

AND

(destination therapy[tiab] OR continuous flow[tiab] OR nonpulsatile[tiab] OR axial flow[tiab] OR heartmate ii[tiab] OR thoratec[tiab] OR heartware[tiab] OR hvad[tiab])

AND

(clinical trial[tiab] OR benefit[tiab] OR risk[tiab] OR survival[tiab] OR death[tiab] OR quality of life[tiab] OR complication[tiab] OR bleeding[tiab] OR stroke[tiab] OR infection[tiab] OR sepsis[tiab] OR renal failure[tiab] OR right ventricular assist device[tiab] OR hospitalization[tiab] OR readmission[tiab] OR device malfunction[tiab] OR pump replacement[tiab] OR reoperation[tiab] OR cardiac arrhythmia[tiab] OR arrhythmia[tiab] OR defibrillator shock[tiab])) AND "humans"[Filter] AND "english"[Filter] AND (2007[pdat] OR 2008[pdat] OR 2009[pdat] OR 2010[pdat] OR 2011[pdat] OR 2012[pdat] OR 2013[pdat] OR 2014[pdat])

**Figure 2.** Adverse Event Definitions

| Term                                    | Definition                                                                                                                                                                                                                                                                                                                                                                                                                                                                                                                                                                                   |
|-----------------------------------------|----------------------------------------------------------------------------------------------------------------------------------------------------------------------------------------------------------------------------------------------------------------------------------------------------------------------------------------------------------------------------------------------------------------------------------------------------------------------------------------------------------------------------------------------------------------------------------------------|
| <b>HeartMate II Trial<sup>1-3</sup></b> |                                                                                                                                                                                                                                                                                                                                                                                                                                                                                                                                                                                              |
| Localized Non-Device Infection          | Infection localized to any organ system or region without evidence of systemic involvement which requires treatment or is ascertained by standard clinical methods and either associated with evidence of bacterial, viral, fungal, and protozoal infection, by standard clinical pathologic/laboratory methods. This definition includes positive blood cultures that are not considered to be septic in etiology.                                                                                                                                                                          |
| Percutaneous Site Infection             | Infection of the percutaneous drive line site evidenced by the need to treat with antimicrobial therapy, when there is clinical evidence of infection such as pain, fever, drainage, and or leukocytosis. This definition includes any positive cultures identified at the time of pump explant.                                                                                                                                                                                                                                                                                             |
| Pump Pocket Infection                   | Infection of the pump pocket area evidence by the need to treat with antimicrobial therapy, when there is clinical evidence of infection such as pain, fever, drainage, and or leukocytosis. This definition includes any positive cultures identified at the times of pump explant.                                                                                                                                                                                                                                                                                                         |
| Sepsis                                  | A systematic response to a serious infection, usually manifested by fever, tachycardia, tachypnea, leukocytosis and vasodilation requiring use of IV antimicrobial therapy. It may or may not be associated with a localized site of infection. It may or may not be accompanied by a positive microbiological culture from the blood, the localized site of infection, or other evidence of bacterial, viral, fungal, or protozoal infection using standard clinical pathologic/ laboratory methods. This definition excludes routine prophylactic treatment with IV antimicrobial therapy. |
| Bleeding                                | An episode of internal or external bleeding that causes death, re-operation, permanent injury, or necessitates transfusion of > 2 units of red blood cells within 24 hours.                                                                                                                                                                                                                                                                                                                                                                                                                  |
| Neurologic Event                        | Any new, temporary or permanent, focal or global, neurological deficit including TIA, metabolic encephalopathy, seizure, etc. The event must be sub-categorized to document the type of neurologic event.                                                                                                                                                                                                                                                                                                                                                                                    |
| Stroke                                  | A neurologic deficit lasting more than 24 hours, or lasting 24 hours or less with a brain imaging study showing new infarction. A TIA is a neurological deficit lasting 24 hours and if an imaging study is performed, shows no evidence of new infarction. Each stroke must be subcategorized as either ischemic or hemorrhagic.                                                                                                                                                                                                                                                            |
| RHF                                     | Symptoms of RHF (e.g. drop in right ventricular ejection associated with right sided congestion including hepatic congestion, peripheral edema, jugular venous distension, etc. requiring either RVAD implantation at any time, or inotropic therapy > 14 days following implant.                                                                                                                                                                                                                                                                                                            |
| Cardiac Arrhythmias                     | Any symptomatic or asymptomatic arrhythmia that requires intervention. The investigator should distinguish four types of events: 1) cardiac arrest, 2) VA, 3) supraventricular arrhythmia, 4) atrial arrhythmia.                                                                                                                                                                                                                                                                                                                                                                             |
| Renal Failure                           | Abnormal kidney function requiring dialysis in patients who did not require this procedure prior to the implant.                                                                                                                                                                                                                                                                                                                                                                                                                                                                             |
| Respiratory Failure                     | Impairment of respiratory function requiring reintubation and/or tracheostomy at any time or the inability to discontinue ventilator support after six days (144 hours) of device support.                                                                                                                                                                                                                                                                                                                                                                                                   |

|                                                                                                           |                                                                                                                                                                                                                                                                                                                                                                                                                                                                     |
|-----------------------------------------------------------------------------------------------------------|---------------------------------------------------------------------------------------------------------------------------------------------------------------------------------------------------------------------------------------------------------------------------------------------------------------------------------------------------------------------------------------------------------------------------------------------------------------------|
| Suspected Device Malfunction/Failure                                                                      | An instance when any component of the system fails to perform its intended function. Losses of the display, inability to operate on batteries, or pump stoppage are examples. Event consequences can be captured on the case report form and will include: hemodynamic compromise, re-operation, death, urgent transplant or initiation of inotropes.                                                                                                               |
| <b>INTERMACS<sup>4</sup></b>                                                                              |                                                                                                                                                                                                                                                                                                                                                                                                                                                                     |
| Localized Non-Device Infection                                                                            | Infection localized to any organ system or region (e.g. mediastinitis) without evidence of systemic involvement (see sepsis definition), ascertained by standard clinical methods and either associated with evidence of bacterial, viral, fungal or protozoal infection, and/or requiring empirical treatment.                                                                                                                                                     |
| Percutaneous Site and/or Pocket Infection                                                                 | A positive culture from the skin and/or tissue surrounding the drive line or from the tissue surrounding the external housing of a pump implanted within the body, coupled with the need to treat with antimicrobial therapy, when there is clinical evidence of infection such as pain, fever, drainage, or leukocytosis.                                                                                                                                          |
| Internal Pump Component or Outflow Tract Infection                                                        | Infection of blood-contacting surfaces of the LVAD documented by positive site culture.                                                                                                                                                                                                                                                                                                                                                                             |
| Sepsis                                                                                                    | Evidence of systemic involvement by infection, manifested by positive blood cultures and/or hypotension.                                                                                                                                                                                                                                                                                                                                                            |
| Major Bleeding                                                                                            | An episode of suspected internal or external bleeding that results in one or more of the following: death, re-operation, hospitalization, transfusion of PRBCs as follows: 1) during first 7 days post implant = $\geq 4$ units PRBC within any 24 hour period or 2) after 7 days post implant any transfusion of PRBCs                                                                                                                                             |
| Neurological Dysfunction                                                                                  | Any new, temporary or permanent, focal or global neurologic deficit, including TIA that resolves within 24 hours, and ischemic or hemorrhagic intracranial CVA that persists beyond 24 hours or less than 24 hours with infarction on an image study.                                                                                                                                                                                                               |
| Right Heart Failure                                                                                       | Symptoms and signs of persistent right ventricular dysfunction [central venous pressure > 18 mmHg with a cardiac index <2.3 L/min/m <sup>2</sup> in the absence of elevated left atrial/pulmonary capillary wedge pressure (greater than 18 mmhg), tamponade, ventricular arrhythmias or pneumothorax] requiring RVAD; implantation; or requiring inhaled nitric oxide or inotropic therapy for a duration of more than 1 week at any time after LVAD implantation. |
| Device Malfunction                                                                                        | Denotes a failure of one or more of the components of the device system which either directly causes or could potentially induce a state of inadequate circulatory support (low cardiac output state) or death.                                                                                                                                                                                                                                                     |
| Cardiac Arrhythmia                                                                                        | Any documented arrhythmia that results in clinical compromise (e.g., diminished LVAD flow, oliguria, pre-syncope or syncope) that requires hospitalization or occurs during a hospital stay.                                                                                                                                                                                                                                                                        |
| <b>American College of Chest Physicians and Society of Critical Care Medicine (ACCP/SCCM)<sup>5</sup></b> |                                                                                                                                                                                                                                                                                                                                                                                                                                                                     |
| Sepsis                                                                                                    | Defined as a systemic inflammatory response syndrome (two or more of: 1) temperature 38°C or 36°C; 2) heart rate 90 beats/min; 3) respiratory rate 20 breaths/min or PaCO <sub>2</sub> 32 mm Hg; or 4) white blood cell count 12,000 cells/mm <sup>3</sup> , 4,000 cells/mm <sup>3</sup> or 10% immature bands) resulting from a confirmed infectious process.                                                                                                      |
| <b>Schmid et al., 2008<sup>6</sup></b>                                                                    |                                                                                                                                                                                                                                                                                                                                                                                                                                                                     |
| Stroke                                                                                                    | Stroke was a clinical diagnosis, defined as cerebral ischemia with consecutive neurologic symptoms persisting for 24 hours, irrespective of findings in cranial CT.                                                                                                                                                                                                                                                                                                 |
| Cerebral Bleeding                                                                                         | Cerebral bleeding, caused either by spontaneous rupture of a blood vessel within the head or after stroke, mandated confirmation by CT scan, regardless of present symptoms.                                                                                                                                                                                                                                                                                        |
| <b>Lahnor et al., 2009<sup>7</sup></b>                                                                    |                                                                                                                                                                                                                                                                                                                                                                                                                                                                     |

|                                           |                                                                                                                                                                                                                                                                                                                                                                                                                                    |
|-------------------------------------------|------------------------------------------------------------------------------------------------------------------------------------------------------------------------------------------------------------------------------------------------------------------------------------------------------------------------------------------------------------------------------------------------------------------------------------|
| RHF                                       | The post-operative need for temporary right ventricular mechanical support or inotropic support for more than 14 days following the implantation.                                                                                                                                                                                                                                                                                  |
| <b>Starling et al., 2013<sup>8</sup></b>  |                                                                                                                                                                                                                                                                                                                                                                                                                                    |
| Confirmed Pump Thrombosis                 | Confirmed pump thrombosis was defined as a thrombus found on the blood-contacting surfaces of the HeartMate II, its inflow cannula, or its outflow conduit at pump replacement, urgent transplantation, or autopsy.                                                                                                                                                                                                                |
| Suspected Pump Thrombosis                 | Suspected pump thrombosis was defined as a clinical diagnosis of pump-related malfunction in which the clinical or device variables suggested a thrombus on the blood-contacting surfaces of the pump, cannulae, or grafts.                                                                                                                                                                                                        |
| <b>Crow et al., 2009<sup>9</sup></b>      |                                                                                                                                                                                                                                                                                                                                                                                                                                    |
| GI Bleeding                               | Defined as a guaiac-positive stool and a hemoglobin drop requiring transfusion of at least 2 units of PRBCs.                                                                                                                                                                                                                                                                                                                       |
| <b>Martin et al., 2010<sup>10</sup></b>   |                                                                                                                                                                                                                                                                                                                                                                                                                                    |
| Infection                                 | Defined as 1) a positive bacterial or fungal culture taken from the bloodstream attributable to the device, and/or from the driveline site, and/or the operative bed, that was treated with antimicrobial agents by the clinicians caring for the patient, or 2) a clinically suspected infection of the device that was surgically debrided and treated with antimicrobial therapy regardless of culture data.                    |
| <b>Tonkara et al., 2010<sup>11</sup></b>  |                                                                                                                                                                                                                                                                                                                                                                                                                                    |
| Driveline/Pump Pocket Infection           | Defined as those that required treatment with antimicrobial therapy, when there is clinical evidence of infection such as pain, fever, drainage, and or leukocytosis.                                                                                                                                                                                                                                                              |
| Local Infections                          | Defined as those limited to any organ system or region without evidence of systemic involvement that requires treatment or is ascertained by standard clinical method.                                                                                                                                                                                                                                                             |
| <b>Uriel et al., 2010<sup>12</sup></b>    |                                                                                                                                                                                                                                                                                                                                                                                                                                    |
| Minor Bleeding                            | Defined as observable blood loss without the need for transfusion.                                                                                                                                                                                                                                                                                                                                                                 |
| Major Bleeding                            | Defined as need for blood transfusion 7 days after device insertion.                                                                                                                                                                                                                                                                                                                                                               |
| Stroke                                    | Defined as any neurologic event lasting 24 hours and categorized as having a hemorrhagic or thromboembolic etiology according to the results of intracranial imaging.                                                                                                                                                                                                                                                              |
| Pump Thrombosis                           | Pump thrombosis was defined as any thrombus within the device or its conduits associated with clinical signs of impaired pump performance                                                                                                                                                                                                                                                                                          |
| <b>Demirozu et al., 2011<sup>13</sup></b> |                                                                                                                                                                                                                                                                                                                                                                                                                                    |
| GI Bleeding                               | Patients were considered to have GI bleeding if they had 1 or more of the following symptoms: guaiac-positive stool; hematemesis; melena; active bleeding at the time of endoscopy or colonoscopy; and blood within the stomach at endoscopy or colonoscopy. The symptom(s) had to be accompanied by a decrease of 1 g/dl in the patient's hemoglobin level, which was considered to necessitate the transfusion of 2 units PRBCs. |
| <b>Schaffer et al., 2011<sup>14</sup></b> |                                                                                                                                                                                                                                                                                                                                                                                                                                    |
| Driveline/Pump Pocket Infection           | Defined as either: 1) purulent drainage from the drive-line exit site (or device pocket); 2) organisms isolated from an aseptically obtained culture of fluid or tissue from the driveline exit site (or device pocket); or 3) an abscess or other evidence of infection involving the drive-line tract (or device pocket) found on direct examination, during re operation or by histopathologic or radiologic examination.       |
| <b>Schaffer et al., 2011<sup>15</sup></b> |                                                                                                                                                                                                                                                                                                                                                                                                                                    |
| GI Bleeding                               | Defined as bleeding with an identifiable GI source by esophagogastroduodenoscopy, colonoscopy, or tagged red blood cell scan.                                                                                                                                                                                                                                                                                                      |
| <b>Aggarwal et al., 2012<sup>16</sup></b> |                                                                                                                                                                                                                                                                                                                                                                                                                                    |
| GI Bleeding                               | Defined as bleeding above the ligament of Treitz and bleeding from the GI tract distal to the ligament of Treitz, respectively.                                                                                                                                                                                                                                                                                                    |

| <b>Aggarwal et al., 2012<sup>17</sup></b>     |                                                                                                                                                                                                                                                                                                                                                                                                                                                                                                   |
|-----------------------------------------------|---------------------------------------------------------------------------------------------------------------------------------------------------------------------------------------------------------------------------------------------------------------------------------------------------------------------------------------------------------------------------------------------------------------------------------------------------------------------------------------------------|
| Device Infection                              | Defined as a culture-positive specimen obtained from any part of the device, including driveline or pocket infections.                                                                                                                                                                                                                                                                                                                                                                            |
| Bloodstream Infection                         | Must meet at least 1 of the following criteria: 1) a recognized pathogen cultured from 1 or more blood cultures and organism cultured from blood is not related to an infection at another site, 2) at least 1 of the following signs or symptoms: fever (>38°C), chills, or hypotension and signs and symptoms and positive laboratory results are not related to an infection at another site and common skin contaminant is cultured from 2 or more blood cultures drawn on separate occasions |
| <b>Brenvo et al., 2012<sup>18</sup></b>       |                                                                                                                                                                                                                                                                                                                                                                                                                                                                                                   |
| VA                                            | Defined as the first ICD therapy for VA after the start of follow-up.                                                                                                                                                                                                                                                                                                                                                                                                                             |
| <b>Morgan et al., 2012<sup>19</sup></b>       |                                                                                                                                                                                                                                                                                                                                                                                                                                                                                                   |
| GI Bleeding                                   | Defined as melena, hematochezia or hematemesis along with a drop in hemoglobin requiring transfusion.                                                                                                                                                                                                                                                                                                                                                                                             |
| <b>Raasch et al., 2012<sup>20</sup></b>       |                                                                                                                                                                                                                                                                                                                                                                                                                                                                                                   |
| Sustained VA Event                            | Defined as a single episode of ventricular tachycardia lasting at least 30 seconds or a VA necessitating termination via antitachycardia pacing or defibrillation.                                                                                                                                                                                                                                                                                                                                |
| <b>Yuan et al., 2012<sup>21</sup></b>         |                                                                                                                                                                                                                                                                                                                                                                                                                                                                                                   |
| RHF                                           | Symptoms of RHF requiring RVAD implantation at any time or inotropic support $\geq 14$ days following LVAD implantation                                                                                                                                                                                                                                                                                                                                                                           |
| Device Failure                                | All types of device malfunction, including mechanical failure, electrical failure, and device thrombosis                                                                                                                                                                                                                                                                                                                                                                                          |
| <b>Borgi et al., 2013<sup>22</sup></b>        |                                                                                                                                                                                                                                                                                                                                                                                                                                                                                                   |
| RHF                                           | Defined as the need for inotropic support for more than 1 week or the need for RVAD support                                                                                                                                                                                                                                                                                                                                                                                                       |
| <b>Deo et al., 2013<sup>23</sup></b>          |                                                                                                                                                                                                                                                                                                                                                                                                                                                                                                   |
| RVF                                           | Defined as the need for IV inotropes for more than 168 hours after the initial surgery                                                                                                                                                                                                                                                                                                                                                                                                            |
| <b>Garan et al., 2013<sup>24</sup></b>        |                                                                                                                                                                                                                                                                                                                                                                                                                                                                                                   |
| VA                                            | Defined as ventricular tachyarrhythmia (ventricular tachycardia or ventricular fibrillation) that received appropriate therapy (antitachycardia pacing or shock) from an ICD or was sustained for >30 s in the absence of effective treatment.                                                                                                                                                                                                                                                    |
| <b>Morgan et al., 2013<sup>25</sup></b>       |                                                                                                                                                                                                                                                                                                                                                                                                                                                                                                   |
| RVF                                           | Defined as the need for IV inotropes for >14 days post-operatively or an RVAD                                                                                                                                                                                                                                                                                                                                                                                                                     |
| <b>Mulloy et al., 2013<sup>26</sup></b>       |                                                                                                                                                                                                                                                                                                                                                                                                                                                                                                   |
| VA                                            | Defined as more than 30 seconds of documented ventricular tachycardia or ventricular fibrillation as seen on a rhythm strip, electrocardiographic tracing, or implantable cardiac defibrillator readout.                                                                                                                                                                                                                                                                                          |
| <b>Sarosiek et al., 2013<sup>27</sup></b>     |                                                                                                                                                                                                                                                                                                                                                                                                                                                                                                   |
| GI Bleeding                                   | Defined as heme-positive stool or hematemesis and a decrease in hemoglobin >1 g/dl.                                                                                                                                                                                                                                                                                                                                                                                                               |
| <b>Wever-Pinzon et al., 2013<sup>28</sup></b> |                                                                                                                                                                                                                                                                                                                                                                                                                                                                                                   |
| GI Bleeding                                   | Defined by clinical evidence of bleeding (guaiac-positive stool, melena, hematochezia, hematemesis, or the presence of blood in the GI tract on endoscopic evaluation) and a decrease in hemoglobin $\geq 2$ g/dL.                                                                                                                                                                                                                                                                                |
| Major Bleeding                                | Defined as an episode of suspected internal or external bleeding resulting in 1 of the following: death, surgical intervention, hospitalization, or transfusion of PRBCs as well as a documented decrease in hemoglobin $\geq 2$ g/dL.                                                                                                                                                                                                                                                            |

Table 1. Summary of Evidence Sources

| Abbreviation                                         | First Author | Year | Total Pts | Total CF Pts | Indication |      |        |            | Device Type     |      |             |                  |           |             |       |                |      |       |         |            |         |           |            |
|------------------------------------------------------|--------------|------|-----------|--------------|------------|------|--------|------------|-----------------|------|-------------|------------------|-----------|-------------|-------|----------------|------|-------|---------|------------|---------|-----------|------------|
|                                                      |              |      |           |              | BTT        | DT   | Other* | Unreported | Continuous Flow |      |             |                  |           |             |       | Pulsatile Flow |      |       |         | Unreported |         |           |            |
|                                                      |              |      |           |              |            |      |        |            | HMII            | HVAD | VentrAssist | MicroMed DeBakey | DuraHeart | Jarvik 2000 | INCOR | HM-XVE         | IVAD | EXCOR | NOVACOR |            | ABIOMED | LionHeart | CardioWest |
| <b>Industry-Funded Trials and Related Registries</b> |              |      |           |              |            |      |        |            |                 |      |             |                  |           |             |       |                |      |       |         |            |         |           |            |
| HMII BTT Trial <sup>1</sup>                          | Miller       | 2007 | 133       | 133          | 133        | -    | -      | -          | -               | 133  | -           | -                | -         | -           | -     | -              | -    | -     | -       | -          | -       | -         | -          |
| HMII BTT Trial Registry <sup>2</sup>                 | Pagani       | 2009 | 281       | 281          | 281        | -    | -      | -          | -               | 281  | -           | -                | -         | -           | -     | -              | -    | -     | -       | -          | -       | -         | -          |
| HMII DT Trial <sup>3</sup>                           | Slaughter    | 2009 | 200       | 134          | 0          | 200  | -      | -          | -               | 134  | -           | -                | -         | -           | -     | 66             | -    | -     | -       | -          | -       | -         | -          |
| HMII BTT Trial Registry RVF <sup>29</sup>            | Kormos       | 2010 | 484       | 484          | 484        | -    | -      | -          | -               | 484  | -           | -                | -         | -           | -     | -              | -    | -     | -       | -          | -       | -         | -          |
| HMII BTT DT Trial Registry <sup>30</sup>             | Rogers       | 2010 | 655       | 655          | 281        | 374  | -      | -          | -               | 655  | -           | -                | -         | -           | -     | -              | -    | -     | -       | -          | -       | -         | -          |
| International HVAD Trial <sup>31</sup>               | Strueber     | 2011 | 50        | 50           | 50         | -    | -      | -          | -               | -    | 50          | -                | -         | -           | -     | -              | -    | -     | -       | -          | -       | -         | -          |
| ADVANCE: HVAD BTT Trial <sup>32</sup>                | Aaronson     | 2012 | 140       | 140          | 140        | -    | -      | -          | -               | -    | 140         | -                | -         | -           | -     | -              | -    | -     | -       | -          | -       | -         | -          |
| HMII DT Trial NC <sup>33</sup> †                     | Petrucci     | 2012 | 126       | 96           | 0          | 126  | -      | -          | -               | 96   | -           | -                | -         | -           | -     | 30             | -    | -     | -       | -          | -       | -         | -          |
| HMII BTT DT Trial Replacement <sup>34</sup>          | Moazami      | 2013 | 1128      | 1128         | 490        | 638  | -      | -          | -               | 1128 | -           | -                | -         | -           | -     | -              | -    | -     | -       | -          | -       | -         | -          |
| ADVANCE: HVAD BTT Trial CAP <sup>35</sup>            | Slaughter    | 2013 | 332       | 332          | 332        | -    | -      | -          | -               | -    | 332         | -                | -         | -           | -     | -              | -    | -     | -       | -          | -       | -         | -          |
| <b>Multicenter Registries</b>                        |              |      |           |              |            |      |        |            |                 |      |             |                  |           |             |       |                |      |       |         |            |         |           |            |
| INCOR Analysis <sup>6</sup>                          | Schmid       | 2008 | 216       | 216          | 0          | -    | -      | 216        | -               | -    | -           | -                | -         | -           | -     | 216            | -    | -     | -       | -          | -       | -         | -          |
| 64 European Institutions <sup>7</sup>                | Lahpor       | 2009 | 411       | 411          | 300        | 86   | 25     | -          | -               | 411  | -           | -                | -         | -           | -     | -              | -    | -     | -       | -          | -       | -         | -          |
| U of Minnesota, Pittsburgh, & Columbia <sup>36</sup> | Boyle        | 2011 | 101       | 101          | 86         | 15   | -      | -          | -               | 74   | -           | 27               | -         | -           | -     | -              | -    | -     | -       | -          | -       | -         | -          |
| John INTERMACS <sup>37</sup>                         | John         | 2011 | 1496      | 1496         | 1496       | -    | -      | -          | -               | 1496 | -           | -                | -         | -           | -     | -              | -    | -     | -       | -          | -       | -         | -          |
| Goldstein INTERMACS <sup>38</sup>                    | Goldstein    | 2012 | 2006      | 2006         | 830        | 291  | 854    | 31         | -               | -    | -           | -                | -         | -           | -     | -              | -    | -     | -       | -          | -       | -         | 2006       |
| Holman INTERMACS <sup>39</sup>                       | Holman       | 2013 | 3302      | 2816         | -          | -    | -      | 3302       | -               | -    | -           | -                | -         | -           | -     | -              | -    | -     | -       | -          | -       | -         | 3302       |
| INTERMACS 2013 <sup>4</sup>                          | Kirklin      | 2013 | 6561      | 5515         | 3742       | 1694 | -      | 79         | -               | -    | -           | -                | -         | -           | -     | -              | -    | -     | -       | -          | -       | -         | 6561       |
| INTERMACS Thrombosis <sup>40</sup>                   | Kirklin      | 2013 | 6910      | 6910         | -          | -    | -      | 6910       | 6910            | -    | -           | -                | -         | -           | -     | -              | -    | -     | -       | -          | -       | -         | -          |
| Najjar ADVANCE BTT & CAP <sup>41</sup>               | Najjar       | 2013 | 382       | 382          | 382        | -    | -      | -          | -               | 382  | -           | -                | -         | -           | -     | -              | -    | -     | -       | -          | -       | -         | -          |
| Cleveland Clinic, Barnes-Jewish, & Duke <sup>5</sup> | Starling     | 2013 | 837       | 837          | -          | -    | -      | 837        | 837             | -    | -           | -                | -         | -           | -     | -              | -    | -     | -       | -          | -       | -         | -          |
| <b>Single Center Reports and Case Series</b>         |              |      |           |              |            |      |        |            |                 |      |             |                  |           |             |       |                |      |       |         |            |         |           |            |
| University of Minnesota <sup>9</sup>                 | Crow         | 2009 | 101       | 55           | 84         | 17   | -      | -          | -               | 38   | -           | 9                | 8         | -           | -     | -              | 46   | -     | -       | -          | -       | -         | -          |
| Medical University of Vienna <sup>42</sup>           | Sandner      | 2009 | 86        | 86           | 86         | 0    | -      | -          | -               | -    | 6           | -                | 75        | 5           | -     | -              | -    | -     | -       | -          | -       | -         | -          |
| University of Michigan <sup>43</sup> †               | Cowger       | 2010 | 78        | 53           | 69         | 9    | -      | -          | -               | 53   | -           | -                | -         | -           | -     | 25             | -    | -     | -       | -          | -       | -         | -          |
| The Ohio State University <sup>10</sup>              | Martin       | 2010 | 145       | 64           | -          | -    | -      | 64         | 52              | -    | 10          | 2                | -         | -           | -     | 64             | 13   | -     | -       | 4          | -       | -         | -          |
| Washington University <sup>11</sup>                  | Topkara      | 2010 | 81        | 81           | 57         | 24   | -      | -          | 64              | -    | 17          | -                | -         | -           | -     | -              | -    | -     | -       | -          | -       | -         | -          |
| Columbia University <sup>12</sup>                    | Uriel        | 2010 | 79        | 79           | 64         | 15   | -      | -          | 79              | -    | -           | -                | -         | -           | -     | -              | -    | -     | -       | -          | -       | -         | -          |
| Texas Heart Institute <sup>13</sup>                  | Demirozu     | 2011 | 172       | 172          | -          | -    | -      | 172        | 172             | -    | -           | -                | -         | -           | -     | -              | -    | -     | -       | -          | -       | -         | -          |
| Texas Heart Institute <sup>44</sup> †                | Demirozu     | 2011 | 107       | 107          | -          | -    | -      | 107        | 107             | -    | -           | -                | -         | -           | -     | -              | -    | -     | -       | -          | -       | -         | -          |
| German Heart Institute Berlin <sup>45</sup>          | Drews        | 2011 | 198       | 111          | -          | -    | -      | 111        | 33              | -    | 1           | 2                | 7         | 8           | 60    | 1              | -    | 49    | 23      | -          | 2       | 12        | -          |
| University of Minnesota <sup>46</sup>                | John         | 2011 | 130       | 130          | 102        | 17   | -      | 11         | 130             | -    | -           | -                | -         | -           | -     | -              | -    | -     | -       | -          | -       | -         | -          |
| Johns Hopkins <sup>14</sup>                          | Schaffer     | 2011 | 133       | 86           | 93         | 40   | -      | -          | 86              | -    | -           | -                | -         | -           | -     | 47             | -    | -     | -       | -          | -       | -         | -          |
| Johns Hopkins <sup>15</sup>                          | Schaffer     | 2011 | 86        | 86           | 57         | 29   | -      | -          | 86              | -    | -           | -                | -         | -           | -     | -              | -    | -     | -       | -          | -       | -         | -          |
| Advocate Christ Medical Center <sup>16</sup>         | Aggarwal     | 2012 | 101       | 101          | 7          | 94   | -      | -          | 101             | -    | -           | -                | -         | -           | -     | -              | -    | -     | -       | -          | -       | -         | -          |
| Advocate Christ Medical Center <sup>17</sup>         | Aggarwal     | 2012 | 87        | 87           | -          | -    | -      | 87         | 87              | -    | -           | -                | -         | -           | -     | -              | -    | -     | -       | -          | -       | -         | -          |
| University of Rochester <sup>18</sup>                | Brenyo       | 2012 | 61        | 61           | 44         | 17   | -      | -          | 58              | -    | -           | -                | -         | 3           | -     | -              | -    | -     | -       | -          | -       | -         | -          |
| Columbia University <sup>17</sup>                    | Kato         | 2012 | 307       | 140          | -          | -    | -      | 307        | 140             | -    | -           | 140              | -         | -           | -     | 167            | -    | -     | -       | -          | -       | -         | -          |
| Henry Ford <sup>19</sup>                             | Morgan       | 2012 | 86        | 86           | 54         | 32   | -      | -          | 86              | -    | -           | -                | -         | -           | -     | -              | -    | -     | -       | -          | -       | -         | -          |
| University of North Carolina <sup>20</sup>           | Raasch       | 2012 | 61        | 61           | 27         | 34   | -      | -          | 47              | -    | -           | -                | -         | 14          | -     | -              | -    | -     | -       | -          | -       | -         | -          |
| University of Minnesota <sup>48</sup>                | Sharma       | 2012 | 143       | 143          | 56         | 87   | -      | -          | 143             | -    | -           | -                | -         | -           | -     | -              | -    | -     | -       | -          | -       | -         | -          |
| Johns Hopkins <sup>21</sup>                          | Yuan         | 2012 | 182       | 133          | 98         | 46   | 38     | -          | 133             | -    | -           | -                | -         | -           | -     | 49             | -    | -     | -       | -          | -       | -         | -          |
| Henry Ford <sup>22</sup>                             | Borgi        | 2013 | 100       | 100          | 68         | 32   | -      | -          | -               | -    | -           | -                | -         | -           | -     | -              | -    | -     | -       | -          | -       | -         | 100        |
| Cleveland Clinic <sup>49</sup>                       | Bunte        | 2013 | 139       | 139          | 55         | 31   | 53     | -          | 139             | -    | -           | -                | -         | -           | -     | -              | -    | -     | -       | -          | -       | -         | -          |
| University of Münster <sup>50</sup>                  | Dell' Aquila | 2013 | 50        | 50           | -          | -    | -      | -          | 50              | 50   | -           | -                | -         | -           | -     | -              | -    | -     | -       | -          | -       | -         | -          |
| University of Minnesota <sup>23</sup>                | Deo          | 2013 | 126       | 126          | 55         | 71   | -      | -          | 126             | -    | -           | -                | -         | -           | -     | -              | -    | -     | -       | -          | -       | -         | -          |
| Montefiore Medical Center <sup>51</sup>              | Forest       | 2013 | 71        | 71           | 19         | 27   | 25     | -          | 58              | 9    | 4           | -                | -         | -           | -     | -              | -    | -     | -       | -          | -       | -         | -          |
| Columbia University <sup>24</sup>                    | Garan        | 2013 | 94        | 94           | 46         | 48   | -      | -          | -               | -    | -           | -                | -         | -           | -     | -              | -    | -     | -       | -          | -       | -         | 94         |
| University of Minnesota <sup>52</sup>                | Hasin        | 2013 | 115       | 115          | 42         | 73   | -      | -          | 115             | -    | -           | -                | -         | -           | -     | -              | -    | -     | -       | -          | -       | -         | -          |
| Henry Ford <sup>25</sup>                             | Morgan       | 2013 | 130       | 130          | 76         | 54   | -      | -          | 122             | 8    | -           | -                | -         | -           | -     | -              | -    | -     | -       | -          | -       | -         | -          |
| University of Virginia <sup>26</sup>                 | Mulloy       | 2013 | 50        | 50           | -          | -    | -      | 50         | 50              | -    | -           | -                | -         | -           | -     | -              | -    | -     | -       | -          | -       | -         | -          |
| German Heart Institute Berlin <sup>53</sup>          | Potapov      | 2013 | 225       | 225          | -          | -    | -      | 225        | -               | 225  | -           | -                | -         | -           | -     | -              | -    | -     | -       | -          | -       | -         | -          |
| Thomas Jefferson University <sup>27</sup>            | Sarosiek     | 2013 | 84        | 59           | 54         | 30   | -      | -          | -               | -    | -           | -                | -         | -           | -     | -              | -    | -     | -       | -          | -       | -         | -          |
| Utah Transplant Affiliated Hospitals <sup>28</sup>   | Wever-Pinzon | 2013 | 134       | 134          | 68         | 52   | 14     | -          | 134             | -    | -           | -                | -         | -           | -     | -              | -    | -     | -       | -          | -       | -         | -          |

\* includes bridge to recovery, bridge to decision, and bridge to candidacy †Study not included in Tables. BTT=bridge to transplant; CAP=continued access protocol; CF=continuous-flow; DT=destination therapy; GI=gastrointestinal; HM-XVE=HeartMate XVE ventricular assist device; HMII= HeartMate II; HVAD=HeartWare ventricular assist device; INTERMACS=Interagency Registry for Mechanically Assisted Circulatory Support; IVAD=implantable ventricular assist device; LVAD=left ventricular assist device; mo=month; NC=neurocognition; PVAD=Paracorporeal ventricular assist device; RRT=renal replacement therapy; RVF=right ventricular failure

**Table 2.** Estimated Actuarial Survival of CF Devices - Single Center Studies or Those with Less Than 100 Continuous Flow Patients

| Study                                                                                                                    | First Author | Year | Total CF | BTT | DT  |  | 1 Mo | 6 Mo | 12 Mo | 24 Mo | 36 Mo | 48 Mo |
|--------------------------------------------------------------------------------------------------------------------------|--------------|------|----------|-----|-----|--|------|------|-------|-------|-------|-------|
| <b>Industry-Funded Trials and Related Registries</b>                                                                     |              |      |          |     |     |  |      |      |       |       |       |       |
| International HVAD Trial <sup>31</sup>                                                                                   | Strueber     | 2011 | 50       | 50  | 0   |  | -    | 90%  | 84%   | 79%   | -     | -     |
| <b>Single Center Reports and Case Series</b>                                                                             |              |      |          |     |     |  |      |      |       |       |       |       |
| Medical University of Vienna <sup>42</sup>                                                                               | Sandner      | 2009 | 86       | 86  | 0   |  | 92%  | 61%  | -     | -     | -     | -     |
| German Heart Institute Berlin <sup>45</sup>                                                                              | Drews        | 2011 | 111      | 0   | 111 |  | -    | -    | 71%   | 70%   | 49%   | -     |
| University of Minnesota <sup>46</sup>                                                                                    | John         | 2011 | 102      | 102 | 0   |  | 95%  | 84%  | 79%   | -     | -     | -     |
| Johns Hopkins <sup>15</sup>                                                                                              | Schaffer     | 2011 | 86       | 57  | 29  |  | -    | -    | 72%   | -     | -     | -     |
| Henry Ford <sup>19</sup>                                                                                                 | Morgan       | 2012 | 86       | 54  | 32  |  | -    | -    | 87%   | 83%   | -     | -     |
| University of North Carolina <sup>20</sup>                                                                               | Raasch       | 2012 | 61       | 27  | 34  |  | -    | 87%  | -     | -     | -     | -     |
| University of Münster <sup>50</sup>                                                                                      | Dell'Aquila  | 2013 | 50       | -   | -   |  | 82%  | -    | 78%   | 76%   | -     | -     |
| University of Minnesota <sup>23</sup>                                                                                    | Deo          | 2013 | 126      | 55  | 71  |  | -    | 88%  | -     | -     | -     | -     |
| University of Virginia <sup>26</sup>                                                                                     | Mulloy       | 2013 | 50       | -   | -   |  | 98%  | -    | -     | -     | -     | -     |
| BTT=bridge to transplant; CF=continuous-flow; DT=destination therapy; HVAD=HeartWare ventricular assist device; mo=month |              |      |          |     |     |  |      |      |       |       |       |       |



**Table 3. Common Adverse Events of CF LVAD – Single Center Studies or Those with Less Than 100 CF Patients**

| Study                                                                                                                                                                                                                                                                                                                                                                                                                           | First Author | Year | Total CF | BTT | DT | Defined Time at Risk# | Bleeding       |                |     | Neurological Event |             |     |       | Infection |           |        |        |       |
|---------------------------------------------------------------------------------------------------------------------------------------------------------------------------------------------------------------------------------------------------------------------------------------------------------------------------------------------------------------------------------------------------------------------------------|--------------|------|----------|-----|----|-----------------------|----------------|----------------|-----|--------------------|-------------|-----|-------|-----------|-----------|--------|--------|-------|
|                                                                                                                                                                                                                                                                                                                                                                                                                                 |              |      |          |     |    |                       | Early ≤30 days | Late > 30 days | GI  | Ischemic           | Hemorrhagic | TIA | Other | Local     | Driveline | Pocket | Sepsis | Other |
| <b>Industry-Funded Trials and Related Registries</b>                                                                                                                                                                                                                                                                                                                                                                            |              |      |          |     |    |                       |                |                |     |                    |             |     |       |           |           |        |        |       |
| International HVAD Trial <sup>31*</sup>                                                                                                                                                                                                                                                                                                                                                                                         | Strueber     | 2011 | 50       | 50  | 0  | 24 mo                 | 20%            | 12%            | -   | 4%                 | 8%          | 4%  | -     | 14%       | 18%       | -      | 10%    | -     |
| HMII BTT DT Trial Replacement <sup>34†</sup>                                                                                                                                                                                                                                                                                                                                                                                    | Moazami      | 2013 | 72       | -   | -  | 19±18 mo              | 9%             | -              | -   | 6%                 | -           | -   | -     | -         | -         | -      | 3%     | -     |
| <b>Single Center Reports and Case Series</b>                                                                                                                                                                                                                                                                                                                                                                                    |              |      |          |     |    |                       |                |                |     |                    |             |     |       |           |           |        |        |       |
| University of Minnesota <sup>9</sup>                                                                                                                                                                                                                                                                                                                                                                                            | Crow         | 2009 | 55       | 46  | 9  | 36 mo                 | -              | -              | 22% | -                  | -           | -   | -     | -         | -         | -      | -      | -     |
| Medical University of Vienna <sup>42</sup>                                                                                                                                                                                                                                                                                                                                                                                      | Sandner      | 2009 | 86       | 86  | 0  | 6 mo                  | 26%            |                | -   | 10%                | 12%         | -   | -     | -         | -         | -      | -      | -     |
| The Ohio State University <sup>10</sup>                                                                                                                                                                                                                                                                                                                                                                                         | Martin       | 2010 | 64       | -   | -  | 18 mo                 | -              | -              | -   | -                  | -           | -   | -     | 22%       |           |        |        |       |
| Washington University <sup>11§</sup>                                                                                                                                                                                                                                                                                                                                                                                            | Topkara      | 2010 | 81       | 57  | 24 | 9±9 mo                | -              | -              | -   | -                  | -           | -   | -     | 37%       | 17%       | 5%     | 19%    | -     |
| Columbia University <sup>12</sup>                                                                                                                                                                                                                                                                                                                                                                                               | Uriel        | 2010 | 79       | 64  | 15 | 12±16 mo              | 44%            |                | 30% | 3%                 | -           | -   | -     | -         | -         | -      | -      | -     |
| Texas Heart Institute <sup>13</sup>                                                                                                                                                                                                                                                                                                                                                                                             | Demirozu     | 2011 | 172      | -   | -  | 2±2 mo                | -              | -              | 19% | -                  | -           | -   | -     | -         | -         | -      | -      | -     |
| University of Minnesota <sup>46</sup>                                                                                                                                                                                                                                                                                                                                                                                           | John         | 2011 | 102      | 102 | 0  | 11±10 mo              | 17%            | -              | 18% | 10%                |             |     | -     | 22%       | 0%        | -      | -      | -     |
| Johns Hopkins <sup>14§</sup>                                                                                                                                                                                                                                                                                                                                                                                                    | Schaffer     | 2011 | 86       | 57  | 29 | 12 mo                 | -              | -              | -   | -                  | -           | -   | -     | -         | 26%       | 9%     | 64%    | -     |
| Johns Hopkins <sup>15</sup>                                                                                                                                                                                                                                                                                                                                                                                                     | Schaffer     | 2011 | 86       | 57  | 29 | 12 mo                 | 23%            | -              | 28% | -                  | -           | -   | -     | -         | -         | -      | -      | -     |
| Advocate Christ Medical Center <sup>16</sup>                                                                                                                                                                                                                                                                                                                                                                                    | Aggarwal     | 2012 | 101      | 7   | 94 | 0-70 mo               | -              | -              | 23% | -                  | -           | -   | -     | -         | -         | -      | -      | -     |
| Advocate Christ Medical Center <sup>17</sup>                                                                                                                                                                                                                                                                                                                                                                                    | Aggarwal     | 2012 | 87       | -   | -  | 19±14 mo              | -              | -              | -   | 9%                 | 11%         | -   | -     | -         | -         | -      | -      | 34%   |
| University of Rochester <sup>18</sup>                                                                                                                                                                                                                                                                                                                                                                                           | Brenyo       | 2012 | 61       | 44  | 17 | 21 mo (m)             | 18%            |                |     | 11%                |             | -   | -     | -         | -         | -      | -      | -     |
| Columbia University <sup>47*</sup>                                                                                                                                                                                                                                                                                                                                                                                              | Kato         | 2012 | 140      | -   | -  | 9±11 mo               | -              | -              | -   | 10%                |             | 4%  | -     | -         | -         | -      | -      | -     |
| Henry Ford <sup>19</sup>                                                                                                                                                                                                                                                                                                                                                                                                        | Morgan       | 2012 | 86       | 54  | 32 | 0-15 mo               | -              | -              | 22% | -                  | -           | -   | -     | -         | -         | -      | -      | -     |
| University of Minnesota <sup>48‡</sup>                                                                                                                                                                                                                                                                                                                                                                                          | Sharma       | 2012 | 143      | 56  | 87 | 11±11 mo              | -              | -              | -   | -                  | -           | -   | -     | -         | 12%       | 6%     | -      | -     |
| Henry Ford <sup>22</sup>                                                                                                                                                                                                                                                                                                                                                                                                        | Borgi        | 2013 | 100      | 68  | 32 | 0-12 mo               | 8%             | -              | 22% | 9%                 | 9%          | -   | -     | 10%       | 6%        | 1%     | -      | 10%   |
| Cleveland Clinic <sup>49*  </sup>                                                                                                                                                                                                                                                                                                                                                                                               | Bunte        | 2013 | 139      | 55  | 31 | 16 mo(m)              | 58%            |                |     | -                  | -           | -   | -     | -         | -         | -      | -      | -     |
| University of Münster <sup>50*</sup>                                                                                                                                                                                                                                                                                                                                                                                            | Dell'Aquila  | 2013 | 50       | -   | -  | 9 mo(m)               | 36%            | 20%            | 26% | 26%                | 4%          | -   | -     | -         | 14%       | -      | -      | 28%   |
| University of Virginia <sup>26</sup>                                                                                                                                                                                                                                                                                                                                                                                            | Mulloy       | 2013 | 50       | -   | -  | 5-13 mo               | -              | -              | -   | 8%                 |             | -   | -     | -         | -         | 2%     | 14%    | -     |
| Thomas Jefferson University <sup>27</sup>                                                                                                                                                                                                                                                                                                                                                                                       | Sarosiek     | 2013 | 59       | -   | -  | 34±19 mo              | -              | -              | 24% | -                  | -           | -   | -     | -         | -         | -      | -      | -     |
| Utah Transplant Affiliated Hospitals <sup>28*  </sup>                                                                                                                                                                                                                                                                                                                                                                           | Wever-Pinzon | 2013 | 134      | 68  | 52 | 3 mo                  | 25%            |                | 17% | -                  | -           | -   | -     | -         | -         | -      | -      | -     |
| Adverse events definitions in Appendix 2.                                                                                                                                                                                                                                                                                                                                                                                       |              |      |          |     |    |                       |                |                |     |                    |             |     |       |           |           |        |        |       |
| * Study uses INTERMACS definitions for adverse events.                                                                                                                                                                                                                                                                                                                                                                          |              |      |          |     |    |                       |                |                |     |                    |             |     |       |           |           |        |        |       |
| † Study uses HeartMate II definitions for adverse events.                                                                                                                                                                                                                                                                                                                                                                       |              |      |          |     |    |                       |                |                |     |                    |             |     |       |           |           |        |        |       |
| ‡ Study uses ISHLT consensus statement definitions for adverse events.                                                                                                                                                                                                                                                                                                                                                          |              |      |          |     |    |                       |                |                |     |                    |             |     |       |           |           |        |        |       |
| § Study uses ACCP/SCCM consensus definition of sepsis.                                                                                                                                                                                                                                                                                                                                                                          |              |      |          |     |    |                       |                |                |     |                    |             |     |       |           |           |        |        |       |
| Study includes alternative indications for implant (i.e. bridge to decision, bridge to candidacy).                                                                                                                                                                                                                                                                                                                              |              |      |          |     |    |                       |                |                |     |                    |             |     |       |           |           |        |        |       |
| # Time at risk was variable among studies: truncated time point (x mo), mean/SD (x ± mo), range (x-y mo).                                                                                                                                                                                                                                                                                                                       |              |      |          |     |    |                       |                |                |     |                    |             |     |       |           |           |        |        |       |
| ACCP/SCCM=American College of Chest Physicians and Society of Critical Care Medicine; BTT=bridge to transplant; CF=continuous-flow; DT=destination therapy; GI=gastrointestinal; HMII= HeartMate II; HVAD=HeartWare ventricular assist device; INTERMACS=Interagency Registry for Mechanically Assisted Circulatory Support; ISHLT=International Society of Heart and Lung Transplant; mo=month; TIA=transient ischemic attack. |              |      |          |     |    |                       |                |                |     |                    |             |     |       |           |           |        |        |       |

**Table 4.** Other Adverse Events of CF Devices - Single Center Studies or Those with Less Than 100 Continuous Flow Patients

| Study                                                                                                                                                                                                                                                                                                                                                           | First Author | Year | Total CF | BTT | DT  | Defined Time at Risk§ | Device Malfunction            |                          | Right Heart Failure |      | Arrhythmia |       | Rehospitalization |
|-----------------------------------------------------------------------------------------------------------------------------------------------------------------------------------------------------------------------------------------------------------------------------------------------------------------------------------------------------------------|--------------|------|----------|-----|-----|-----------------------|-------------------------------|--------------------------|---------------------|------|------------|-------|-------------------|
|                                                                                                                                                                                                                                                                                                                                                                 |              |      |          |     |     |                       | Thrombosis Requiring Exchange | Other Requiring Exchange | Inotropic Support   | RVAD | VA         | Other |                   |
| <b>Industry-Funded Trials and Related Registries</b>                                                                                                                                                                                                                                                                                                            |              |      |          |     |     |                       |                               |                          |                     |      |            |       |                   |
| International HVAD Trial <sup>31*</sup>                                                                                                                                                                                                                                                                                                                         | Strueber     | 2011 | 50       | 50  | 0   | 24 mo                 | 8%                            | 6%                       | 6%                  | 6%   | 4%         | -     | 1.2 adm/pt-yr     |
| HMII BTT DT Trial Replacement <sup>34†</sup>                                                                                                                                                                                                                                                                                                                    | Moazami      | 2013 | 72       | -   | -   | 19±18 mo              | 2%                            | 4%                       | 9%                  | 2%   | -          | -     | -                 |
| <b>Single Center Reports and Case Series</b>                                                                                                                                                                                                                                                                                                                    |              |      |          |     |     |                       |                               |                          |                     |      |            |       |                   |
| Medical University of Vienna <sup>42</sup>                                                                                                                                                                                                                                                                                                                      | Sandner      | 2009 | 86       | 86  | 0   | 6 mo                  | -                             | -                        | -                   | 6%   | -          | -     | -                 |
| German Heart Institute Berlin <sup>45</sup>                                                                                                                                                                                                                                                                                                                     | Drews        | 2011 | 111      | 0   | 111 | 23±8 mo               | -                             | 6%                       | -                   | -    | -          | -     | 2.8 adm/pt-yr     |
| University of Minnesota <sup>46</sup>                                                                                                                                                                                                                                                                                                                           | John         | 2011 | 102      | 102 | 0   | 11±10 mo              | 1%                            | 2%                       | -                   | 5%   | -          | -     | -                 |
| University of Rochester <sup>18</sup>                                                                                                                                                                                                                                                                                                                           | Brenyo       | 2012 | 61       | 44  | 17  | 21 mo(m)              | 11%                           |                          | -                   | -    | 31%        | -     | -                 |
| University of North Carolina <sup>20</sup>                                                                                                                                                                                                                                                                                                                      | Raasch       | 2012 | 61       | 27  | 34  | 0-12 mo               | -                             | -                        | -                   | -    | 43%        | -     | 20%               |
| Johns Hopkins <sup>21‡</sup>                                                                                                                                                                                                                                                                                                                                    | Yuan         | 2012 | 133      | 68  | 40  | 13±13 mo              | 12%                           |                          | 22%                 |      | -          | -     | -                 |
| Henry Ford <sup>22</sup>                                                                                                                                                                                                                                                                                                                                        | Borgi        | 2013 | 100      | 68  | 32  | 0-12 mo               | -                             | -                        | 11%                 | 5%   | -          | -     | 24%               |
| University of Münster <sup>50*</sup>                                                                                                                                                                                                                                                                                                                            | Dell'Aquila  | 2013 | 50       | -   | -   | 9 mo(m)               | -                             | -                        | 24%                 |      | 4%         |       | 1.8 adm/pt-year   |
| University of Minnesota <sup>23</sup>                                                                                                                                                                                                                                                                                                                           | Deo          | 2013 | 126      | 55  | 71  | 15 mo(m)              | -                             | -                        | 25%                 | 3%   | -          | -     | -                 |
| Montefiore Medical Center <sup>51‡</sup>                                                                                                                                                                                                                                                                                                                        | Forest       | 2013 | 71       | 19  | 27  | 2±4 mo                | -                             | -                        | -                   | -    | -          | -     | 79%               |
| Columbia University <sup>24</sup>                                                                                                                                                                                                                                                                                                                               | Garan        | 2013 | 94       | 46  | 48  | 4 mo(m)               | -                             | -                        | -                   | -    | 23%        | -     | -                 |
| University of Minnesota <sup>52</sup>                                                                                                                                                                                                                                                                                                                           | Hasin        | 2013 | 115      | 42  | 73  | 13±11 mo              | -                             | -                        | -                   | -    | -          | -     | 1.6 adm/pt-yr     |
| Henry Ford <sup>25</sup>                                                                                                                                                                                                                                                                                                                                        | Morgan       | 2013 | 130      | 76  | 54  | 13 mo(m)              | -                             | -                        | 5%                  | 4%   | -          | -     | -                 |
| University of Virginia <sup>26</sup>                                                                                                                                                                                                                                                                                                                            | Mulloy       | 2013 | 50       | -   | -   | 5-13 mo               | -                             | -                        | -                   | -    | 32%        | -     | 20%               |
| German Heart Institute Berlin <sup>53</sup>                                                                                                                                                                                                                                                                                                                     | Potapov      | 2013 | 225      | -   | -   | 8 mo(m)               | 5%                            | 1%                       | -                   | -    | -          | -     | -                 |
| Adverse events definitions in Supplemental Methods: Figure 2.                                                                                                                                                                                                                                                                                                   |              |      |          |     |     |                       |                               |                          |                     |      |            |       |                   |
| * Study uses INTERMACS definitions for adverse events.                                                                                                                                                                                                                                                                                                          |              |      |          |     |     |                       |                               |                          |                     |      |            |       |                   |
| † Study uses HeartMate II definitions for adverse events.                                                                                                                                                                                                                                                                                                       |              |      |          |     |     |                       |                               |                          |                     |      |            |       |                   |
| ‡ Study includes alternative indications for implant (i.e. bridge to decision, bridge to candidacy)                                                                                                                                                                                                                                                             |              |      |          |     |     |                       |                               |                          |                     |      |            |       |                   |
| § Time at risk was variable among studies: truncated time point (x mo), mean/SD (x ± y mo), range (x-y mo), mean (x mo(m))                                                                                                                                                                                                                                      |              |      |          |     |     |                       |                               |                          |                     |      |            |       |                   |
| adm=admission; BTT=bridge to transplant; CF=continuous-flow; DT=destination therapy; HMII= HeartMate II; HVAD=HeartWare ventricular assist device; INTERMACS=Interagency Registry for Mechanically Assisted Circulatory Support; mo=month; pt=patient; RVAD=right ventricular assist device; RVF=right ventricular failure; VA=ventricular arrhythmia; yr=year. |              |      |          |     |     |                       |                               |                          |                     |      |            |       |                   |

## SUPPLEMENTAL FIGURE LEGENDS

### Figure 1. Search Algorithm

---

### Figure 2. Adverse Event Definitions

#### Abbreviations:

ACCP/SCCM=American College of Chest Physicians and Society of Critical Care Medicine; CT=computed tomography; CVA=cerebrovascular accident; GI=gastrointestinal; ICD=internal cardioverter defibrillator; INTERMACS=Interagency Registry for Mechanically Assisted Circulatory Support; IV=intravenous; LVAD=left ventricular assist device; PRBC=packed red blood cell; RHF=right heart failure; RVAD=right ventricular assist device; TIA=transient ischemic attack; VA=ventricular arrhythmia

## SUPPLEMENTAL REFERENCES

1. Miller LW, Pagani FD, Russell SD, John R, Boyle AJ, Aaronson KD, Conte JV, Naka Y, Mancini D, Delgado RM, MacGillvray TE, Farrar DJ, Frazier OH. Use of a continuous-flow device in patients awaiting heart transplantation. *N Engl J Med.* 2007;357:885-896.
2. Pagani FD, Miller LW, Russell SD, Aaronson KD, John R, Boyle AJ, Conte JV, Bogaev RC, MacGillvray TE, Naka Y, Mancini D, Massey HT, Chen L, Klodell CT, Aranda JM, Moazami N, Ewald GA, Farrar DJ, Frazier OH. Extended mechanical circulatory support with a continuous-flow rotary left ventricular assist device. *J Am Coll Cardiol.* 2009;54:312-321.
3. Slaughter MS, Rogers JG, Milano CA, Russell SD, Conte JV, Feldman D, Sun B, Tatroles AJ, Delgado RM 3<sup>rd</sup>, Long JW, Wozniak TC, Ghumman W, Farrar DJ, Frazier OH. Advanced heart failure treated with continuous-flow left ventricular assist device. *N Engl J Med.* 2009;361:2241-2251.
4. Kirklin JK, Naftel DC, Kormos RL, Stevenson LW, Pagani FD, Miller MA, Timothy Baldwin J, Young JB. Fifth INTERMACS annual report: risk factor analysis from more than 6,000 mechanical circulatory support patients. *J Heart Lung Transplant.* 2013;32:141-156.
5. American College of Chest Physicians/Society of Critical Care Medicine Consensus Conference: Definitions for sepsis and organ failure and guidelines for the use of innovative therapies in sepsis. *Crit Care Med.* 1992;20:864-74.
6. Schmid C, Jurmann M, Birnbaum D, Colombo T, Falk V, Feltrin G, Garatti A, Genoni M, Gerosa G, Gottel P, Gummert J, Halfmann R, Hammel D, Hennig E,

- Kaufmann F, Lanfranconi M, Meyns B, Mohr F, Muller J, Nikolov D, Rucinskas K, Scheld HH, Schmid FX, Schneider M, Sirvydis V, Tandler R, Vitali E, Vlasselaers D, Weyland M, Wilhelm M, Hetzer R. Influence of inflow cannula length in axial-flow pumps on neurologic adverse event rate: results from a multi-center analysis. *J Heart Lung Transplant*. 2008;27:253-60.
7. Lahpor J, Khaghani A, Hetzer R, Pavie A, Friedrich I, Sander K, Struber M. European results with a continuous-flow ventricular assist device for advanced heart-failure patients. *Eur J Cardiothorac Surg*. 2010;37:357-361.
  8. Starling RC, Moazami N, Silvestry SC, Ewald G, Rogers JG, Milano CA, Rame JE, Acker MA, Blackstone EH, Ehrlinger J, Thuita L, Mountis MM, Soltesz, Lytle BW, Smedira NG. Unexpected abrupt increase in left ventricular assist device thrombosis. *N Engl J Med*. 2014;370:33-40.
  9. Crow S, John R, Boyle A, Shumway S, Liao K, Colvin-Adams M, Toninato C, Missov E, Pritzker M, Martin C, Garry D, Thomas W, Joyce L. Gastrointestinal bleeding rates in recipients of nonpulsatile and pulsatile left ventricular assist devices. *J Thorac Cardiovasc Surg*. 2009;137:208-215.
  10. Martin SI, Wellington L, Stevenson KB, Mangino JE, Sai-Sudhakar CB, Firstenberg MS, Blais D, Sun BC. Effect of body mass index and device type on infection in left ventricular assist device support beyond 30 days. *Interact Cardiovasc Thorac Surg*. 2010;11:20-23.
  11. Topkara VK, Kondareddy S, Malik F, Wang IW, Mann DL, Ewald GA, Moazami N. Infectious complications in patients with left ventricular assist device: etiology and outcomes in the continuous-flow era. *Ann Thorac Surg*. 2010;90:1270-1277.

12. Uriel N, Pak SW, Jorde UP, Jude B, Susen S, Vincentelli A, Ennezat PV, Cappleman S, Naka Y, Mancini D. Acquired von Willebrand syndrome after continuous-flow mechanical device support contributes to a high prevalence of bleeding during long-term support and at the time of transplantation. *J Am Coll Cardiol.* 2010;56:1207-1213.
13. Demirozu ZT, Radovancevic R, Hochman LF, Gregoric ID, Letsou GV, Kar B, Bogaev RC, Frazier OH. Arteriovenous malformation and gastrointestinal bleeding in patients with the HeartMate II left ventricular assist device. *J Heart Lung Transplant.* 2011;30:849-853.
14. Schaffer JM, Allen JG, Weiss ES, Arnaoutakis GJ, Patel ND, Russell SD, Shah AS, Conte JV. Infectious complications after pulsatile-flow and continuous-flow left ventricular assist device implantation. *J Heart Lung Transplant.* 2011;30:164-174.
15. Schaffer JM, Arnaoutakis GJ, Allen JG, Weiss ES, Patel ND, Russell SD, Shah AS, Conte JV. Bleeding complications and blood product utilization with left ventricular assist device implantation. *Ann Thorac Surg.* 2011;91:740-747.
16. Aggarwal A, Pant R, Kumar S, Sharma P, Gallagher C, Tatroles AJ, Pappas PS, Bhat G. Incidence and management of gastrointestinal bleeding with continuous flow assist devices. *Ann Thorac Surg.* 2012;93:1534-1540.
17. Aggarwal A, Gupta A, Kumar S, Baumblatt JA, Pauwaa S, Gallagher C, Treitman A, Pappas P, Tatroles A, Bhat G. Are blood stream infections associated with an increased risk of hemorrhagic stroke in patients with a left ventricular assist device? *ASAIO J.* 2012;58:509-513.

18. Brenyo A, Rao M, Koneru S, Hallinan W, Shah S, Massey HT, Chen L, Polonsky B, McNitt S, Huang DT, Goldenberg I, Aktas M. Risk of mortality for ventricular arrhythmia in ambulator LVAD patients. *J Cardiovasc Electrophysiol.* 2012;23:515-520.
19. Morgan JA, Paone G, Nemeh HW, Henry SE, Patel R, Vavra J, Williams CT, Lanfear DE, Tita C, Brewer RJ. Gastrointestinal bleeding with the HeartMate II left ventricular assist device. *J Heart Lung Transplant.* 2012;31:715-718.
20. Raasch H, Jensen BC, Chang PP, Mounsey JP, Gehi AK, Chung EH, Sheridan BC, Bowen A, Katz JN. Epidemiology, management, and outcomes of sustained ventricular arrhythmias after continuous-flow left ventricular assist device implantation. *Am Heart J.* 2012;164:373-378.
21. Yuan BA, Arnaoutakis GJ, George TJ, Allen JG, Ju DG, Schaffer JM, Russell SD, Shah AS, Conte JV. The spectrum of complications following left ventricular assist device placement. *J Card Surg.* 2012;27:630-638.
22. Borgi J, Tsiouris A, Hodari A, Cogan CM, Paone G, Morgan JA. Significance of postoperative acute renal failure after continuous-flow left ventricular assist device implantation. *Ann Thorac Surg.* 2013;95:163-169.
23. Deo SV, Daly RC, Altarabsheh SE, Hasin T, Zhao Y, Shah IK, Stulak JM, Boilson BA, Schirger JA, Joyce LD, Park SJ. Predictive value of the model for end-stage liver disease score in patients undergoing left ventricular assist device implantation. *ASAIO J.* 2013;59:57-62.
24. Garan AR, Yuzefpolskaya M, Colombo PC, Morrow JP, Te-Frey R, Dano D, Takayama H, Naka Y, Garan H, Jorde UP, Uriel N. Ventricular arrhythmias and

- implantable cardioverter-defibrillator therapy in patients with continuous-flow left ventricular assist devices. *J Am Coll Cardiol*. 2013;61:2542-2550.
25. Morgan JA, Paone G, Neme H, Murthy R, Williams CT, Lanfear DE, Tita C, Brewer RJ. Impact of continuous-flow left ventricular assist device support on right ventricular function. *J Heart Lung Transplant*. 2013;32:398-403.
26. Mulloy DP, Bhamidipati CM, Stone ML, Ailawadi G, Bergin JD, Mahapatra S, Kern JA. Cryoablation during left ventricular assist device implantation reduces postoperative ventricular tachyarrhythmias. *J Thorac Cardiovasc Surg*. 2013;145:1207-1213.
27. Sarosiek K, Bogar L, Conn MI, O'Hare B, Hirose H, Cavarocchi NC. An old problem with a new therapy: gastrointestinal bleeding in ventricular assist device patients and deep overtube-assisted enteroscopy. *ASAIO J*. 2013;59:384-389.
28. Wever-Pinzon O, Selzman CH, Drakos SG, Saidi A, Stoddard GJ, Gilbert EM, Labedi M, Reid BB, Davis ES, Kfoury AG, Li DY, Stehlik J, Bader F. Pulsatility and the risk of nonsurgical bleeding in patients supported with the continuous-flow left ventricular assist device HeartMate II. *Circ Heart Fail*. 2013;6:517-526.
29. Kormos RL, Teuteberg JJ, Pagani FD, Russell SD, John R, Miller LW, Massey T, Milano CA, Moazami N, Sundareswaran KS, Farrar DJ. Right ventricular failure in patients with the HeartMate II continuous-flow left ventricular assist device: incidence, risk factors, and effect on outcomes. *J Thorac Cardiovasc Surg*. 2010;139:1316-1324.
30. Rogers JG, Aaronson KD, Boyle AJ, Russell SD, Milano CA, Pagani FD, Edwards BS, Park S, John R, Conte JV, Farrar DJ, Slaughter MS. Continuous



- flow left ventricular assist device improves functional capacity and quality of life of advanced heart failure patients. *J Am Coll Cardiol.* 2010;55:1826-1834.
31. Strueber M, O'Driscoll G, Jansz P, Khaghani A, Levy WC, Wieselthaler GM. Multicenter evaluation of an intrapericardial left ventricular assist system. *J Am Coll Cardiol.* 2011;57:1375-1382.
32. Aaronson KD, Slaughter MS, Miller LW, McGee EC, Cotts WG, Acker MA, Jessup ML, Gregoric ID, Loyalka P, Frazier OH, Jeevanandam V, Anderson AS, Kormos RL, Teuteberg JJ, Levy WC, Naftel DC, Bittman RM, Pagani FD, Hathaway DR, Boyce SW. Use of an intrapericardial, continuous-flow, centrifugal pump in patients awaiting heart transplant. *Circulation.* 2012;125:3191-3200.
33. Petrucci RJ, Rogers JG, Blue L. Neurocognitive function in destination therapy patients receiving continuous-flow vs pulsatile-flow ventricular assist device support. *J Heart Lung Transplant.* 2012;31:27-36.
34. Moazami N, Milano CA, John R, Sun B, Adamson RM, Pagani FD, Smedira N, Slaughter MS, Farrar DJ, Frazier OH. Pump replacement for left ventricular assist device failure can be done safely and is associated with low mortality. *Ann Thorac Surg.* 2013;95:500-505.
35. Slaughter MS, Pagani FD, McGee EC, Birks EJ, Cotts WG, Gregoric I, Howard Frazier O, Icenogle T, Najjar SS, Boyce SW, Acker MA, John R, Hathaway DR, Najarian KB, Aaronson KD. HeartWare ventricular assist system for bridge to transplant: combined results of the bridge to transplant and continued access protocol trial. *J Heart Lung Transplant.* 2013;32:675-683.

36. Boyle AJ, Ascheim DD, Russo MJ, Kormos RL, John R, Naka Y, Gelijns AC, Hong KN, Teuteberg JJ. Clinical outcomes for continuous-flow left ventricular assist device patients stratified by pre-operative INTERMACS classification. *J Heart Lung Transplant*. 2011;30:402-407.
37. John R, Naka Y, Smedira NG, Starling R, Jorde U, Eckman P, Farrar DJ, Pagani FD. Continuous flow left ventricular assist device outcomes in commercial use compared with the prior clinical trial. *Ann Thorac Surg*. 2011;92:1406-1413.
38. Goldstein DJ, Naftel D, Holman W, Bellumkonda L, Pamboukian SV, Pagani FD, Kirklin J. Continuous-flow devices and percutaneous site infections: clinical outcomes. *J Heart Lung Transplant*. 2012;31:1151-1157.
39. Holman WL, Naftel DC, Eckert CE, Kormos RL, Goldstein DJ, Kirklin JK. *J Thorac Cardiovasc Surg*. 2013;146:437-441.
40. Kirklin JK, Naftel DC, Kormos RL, Pagani FD, Myers SL, Stevenson LW, Acker MA, Goldstein DL, Silvestry SC, Milano CA, Timothy Baldwin J, Pinney S, Eduardo Rame J, Miller MA. Interagency Registry for Mechanically Assisted Circulatory Support (INTERMACS) analysis of pump thrombosis in the Heartmate II left ventricular assist device. *J Heart Lung Transplant*. 2014;33:12-22.
41. Najjar SS, Slaughter MS, Pagani FD, Starling RC, McGee EC, Eckman P, Tatroles AJ, Moazami N, Kormos RL, Hathaway DR, Najarian KB, Bhat G, Aaronson KD, Boyce SW. An analysis of pump thrombus events in patients in the HeartWare ADVANCE bridge to transplant and continued access protocol trial. *J Heart Lung Transplant*. 2014;33:23-34.

42. Sandner SE, Zimpfer D, Zrunek P, Rajek A, Schima H, Dunkler D, Zuckermann AO, Wieselthaler GM. Age and outcome after continuous-flow left ventricular device implantation as bridge to transplantation. *J Heart Lung Transplant*. 2009;28:367-372.
43. Cowger J, Pagani FD, Haft JW, Romano MA, Aaronson KD, Koliass TJ. The development of aortic insufficiency in left ventricular assist device-support patients. *Circ Heart Fail*. 2010;3:668-674.
44. Demirozu ZT, Etheridge WB, Radovancevic R, Frazier OH. Results of HeartMate II left ventricular assist device implantation on renal function in patients requiring post-implant renal replacement therapy. *J Heart Lung Transplant*. 2011;30:182-187.
45. Drews T, Dandel M, Krabatsch T, Potapov E, Stepanenko A, Hennig E, Lehmkuhl HB, Pasic M, Weng Y, Hetzer R. Long-term mechanical circulatory support in 198 patients: largest single-center experience worldwide. *ASAIO J*. 2011;57:9-16.
46. John R, Kamder F, Eckman P, Colvin-Adams M, Boyle A, Shumway S, Joyce L, Liao K. Lessons learned from experience with over 100 consecutive HeartMate II left ventricular assist devices. *Ann Thorac Surg*. 2011;92:1593-1599.
47. Kato TS, Schulze PC, Yang J, Chan E, Shahzad K, Takayama H, Uriel N, Jorde U, Farr M, Naka Y, Mancini D. Pre-operative and post-operative risk factors associated with neurologic complications in patient with advanced heart failure supported by a left ventricular assist device. *J Heart Lung Transplant*. 2012;31:1-8.

48. Sharma V, Deo SV, Stulak JM, Durham LA 3<sup>rd</sup>, Daly RC, Park SJ, Baddour LM, Mehra K, Joyce LD. Driveline infections in left ventricular assist devices: implications for destination therapy. *Ann Thorac Surg.* 2012;94:1381-1386.
49. Bunte MC, Blackstone EH, Thuita L, Fowler J, Joseph L, Ozaki A, Starling RC, Smedira NG, Mountis MM. Major bleeding during HeartMate II support. *J Am Coll Cardiol.* 2013;62:2188-2196.
50. Dell'Aquila AM, Schneider SRB, Schlarb D, Redwan B, Sindermann JR, Ellger B, Stypmann J, Tjan TD, Scheld HH, Hoffmeier A. Initial clinical experience with the HeartWare left ventricular assist system: a single-center report. *Ann Thorac Surg.* 2013;95:170-177.
51. Forest SJ, Bello R, Friedmann P, Casazza D, Nucci C, Shin JJ, D'Alessandro, Stevens G, Goldstein DJ. Readmissions after ventricular assist device: Etiologies, patterns, and days out of the hospital. *Ann Thorac Surg.* 2013;95:1276-1281.
52. Hasin T, Marmor Y, Kremers W, Topilsky Y, Severson CJ, Schirger JA, Boilson BA, Clavell AL, Rodeheffer RJ, Frantz RP, Edwards BS, Pereira NL, Stulak JM, Joyce L, Daly R, Park SJ, Kushwaha SS. Readmissions after implantation of axial flow left ventricular assist device. *J Am Coll Cardiol.* 2013;61:153-163.
53. Potapov EV, Stepanenko A, Kaufmann F, Henning E, Vierecke J, Lehmkuhl E, Hetzer R, Krabatsch T. Thrombosis and cable damage in the HeartWare pump: clinical decisions and surgical technique. *ASAIO J.* 2013;59:37-40.
